# Supplementary material for: Inferring Phenotypic Properties from Single-Cell Characteristics
Source: PubMed Central journal article supplement (PMC3360688; doi:10.1371/journal.pone.0037038), 2012-05-25
Supplement: pone.0037038.s001.pdf [file pone.0037038.s001.pdf]

## S1. Data quality check figures

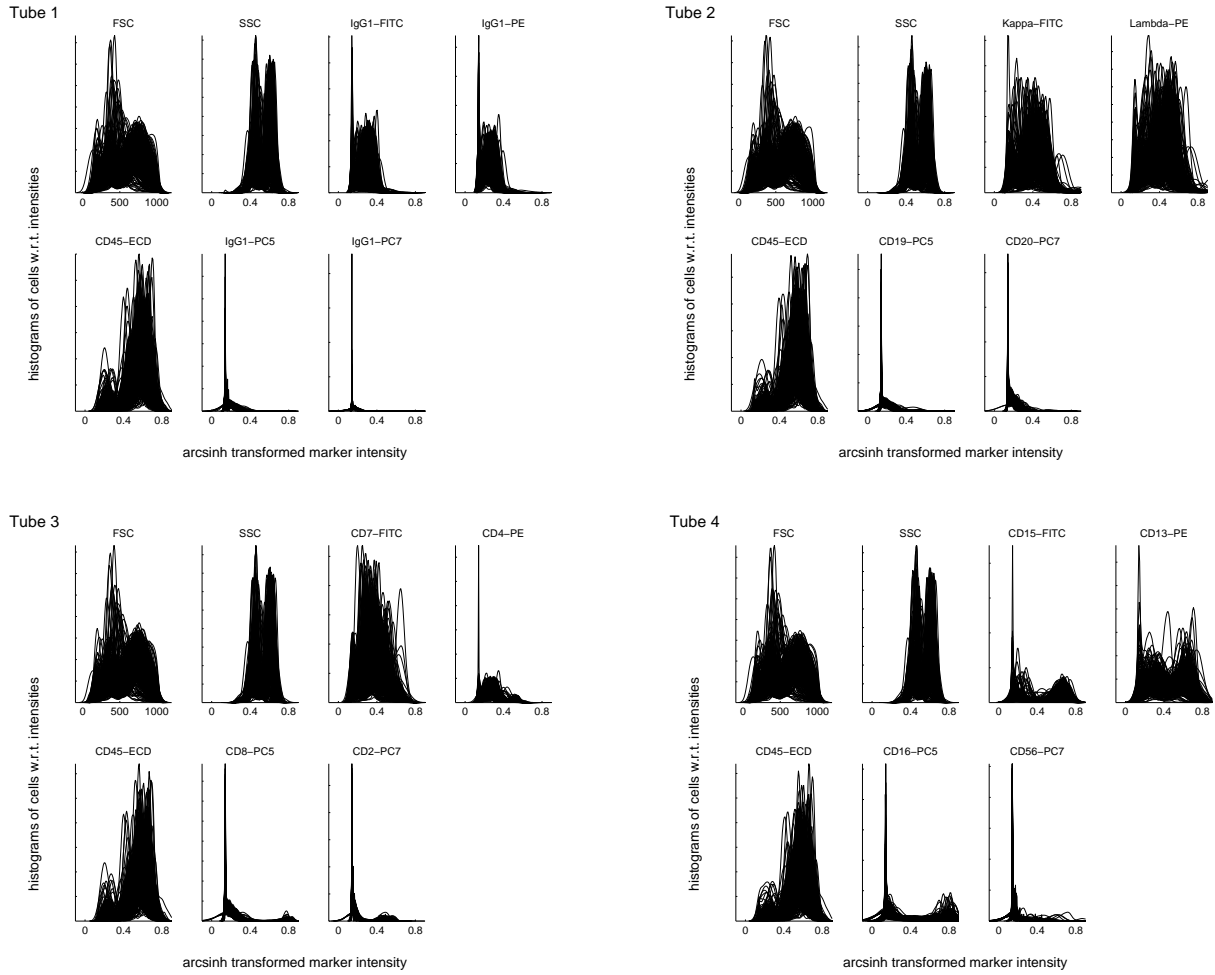

Figure S1: Distributions of marker intensities in data of tubes 1-4. Each small panel contains 359 curves, and each curve shows the distributions of the intensities of one marker in one tube for one of the 359 samples.

Tube 5

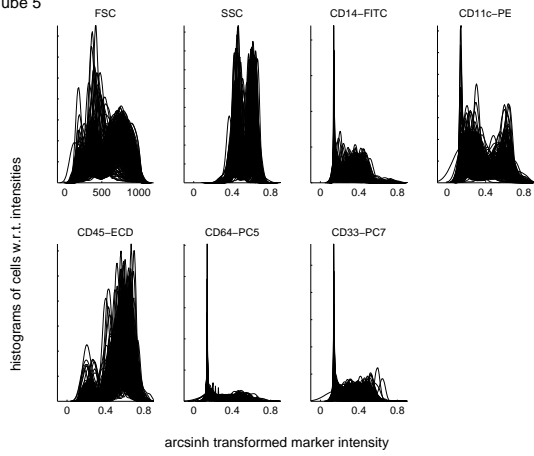

Tube 6

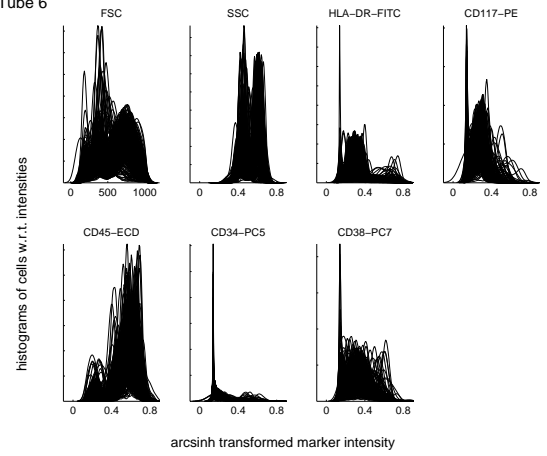

Tube 7

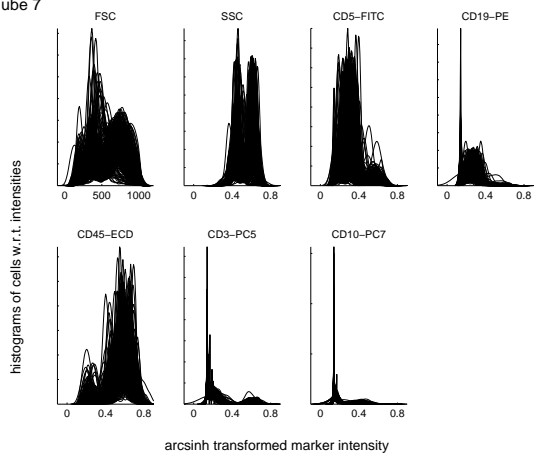

Tube 8

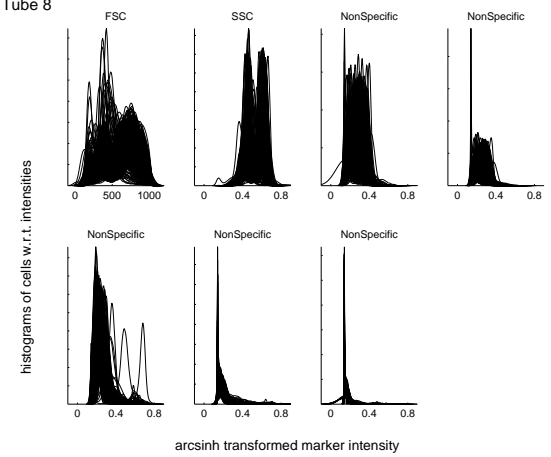

Figure S2: Distributions of marker intensities in data of tubes 5-8. Each small panel contains 359 curves, and each curve shows the distributions of the intensities of one marker in one tube for one of the 359 samples.
