# Supplementary material for: Inferring Phenotypic Properties from Single-Cell Characteristics
Source: PubMed Central journal article supplement (PMC3360688; doi:10.1371/journal.pone.0037038), 2012-05-25
Supplement: pone.0037038.s003.pdf [file pone.0037038.s003.pdf]

### S3. Classification based on individual or subsets of tubes

Table S1: Prediction results obtained by either SPADE+EMD+RELIEF applied to individual tubes, or summary using subsets of the tubes.

|                    | number of<br>predicted normal | number of<br>predicted AML | Precision | Recall | prediction<br>scores |
|--------------------|-------------------------------|----------------------------|-----------|--------|----------------------|
| Tube 1 - isotype   | 157                           | 23                         | 0.78      | 0.90   | Figure S3            |
| Tube 2             | 162                           | 18                         | 1         | 0.90   | Figure S4            |
| Tube 3             | 166                           | 14                         | 1         | 0.70   | Figure S5            |
| Tube 4             | 160                           | 20                         | 0.90      | 0.90   | Figure S6            |
| Tube 5             | 163                           | 17                         | 0.94      | 0.80   | Figure S7            |
| Tube 6             | 161                           | 19                         | 0.95      | 0.90   | Figure S8            |
| Tube 7             | 164                           | 16                         | 1         | 0.80   | Figure S9            |
| Tube 8 - unstained | 149                           | 31                         | 0.61      | 0.95   | Figure S10           |
| Tubes 2-7          | 160                           | 20                         | 1         | 1      | not shown            |
| Tubes 1-8          | 160                           | 20                         | 1         | 1      | Figure 6             |
